# Supplementary material
Source: publisher figshare collection journal article supplement (https://karger.figshare.com/articles/dataset/_/5126077)
Supplement: Supplementary file 1 [file 1]

**Supplemental Table 1. Visual and Ecological Comparative Mammalian Dataset.**

| Species                       | AD    | VA    | BM     | MT | MRS | AP | D <sup>1</sup> | VA                  | Sources<br>AD, BM | D,AP    | MRS     |
|-------------------------------|-------|-------|--------|----|-----|----|----------------|---------------------|-------------------|---------|---------|
| <b><u>Artiodactyla</u></b>    |       |       |        |    |     |    |                |                     |                   |         |         |
| <i>Bos taurus</i>             | 30.78 | 10.31 | 679.05 | A  | 60  | D  | H              | this study: [1,2]   | [2]               | [3,4]   | [8]     |
| <i>Camelus bactrianus</i>     | 40    | 10    | 400    | B  |     |    |                | [5]                 | [6,7]             | [3,6]   |         |
| <i>Camelus dromedarius</i>    | 33    | 10.4  | 415    | A  |     |    |                | [5]                 | [5,9]             |         |         |
| <i>Capra hircus</i>           | 25.84 | 8.43  | 27.66  | A  |     |    |                | this study: [10,11] | [2]               |         |         |
| <i>Dama dama</i>              | 34    | 18.48 | 80     | A  |     | C  | H              | this study: [6,12]  | [6,13]            |         | [3,4]   |
| <i>Giraffa camelopardalis</i> | 42.26 | 25.46 | 1000   | A  |     |    |                | [14]                | [13]              |         |         |
| <i>Ovis aries</i>             | 26.11 | 5.61  | 52.1   | B  |     |    |                | [15]                | [2]               |         |         |
| <i>Sus scrofa</i>             | 24.8  | 9.92  | 86.78  | A  |     |    |                | this study: [16,17] | [2,9]             |         |         |
| <b><u>Carnivora</u></b>       |       |       |        |    |     |    |                |                     |                   |         |         |
| <i>Acinonyx jubatus</i>       | 36.7  | 23.02 | 45.6   | A  |     |    |                | this study: [6,12]  | [6,9]             |         | [23,24] |
| <i>Canis lupus</i>            | 22.5  | 14.57 | 31.65  | A  |     |    |                | this study: [18,19] | [6,9]             |         |         |
| <i>Crocuta crocuta</i>        | 28.68 | 8.4   | 64.23  | A  |     |    |                | [20]                | [2,9]             |         |         |
| <i>Enhydra lutris</i>         | 14    | 4.2   | 27.05  | A  |     |    |                | [21]                | [2,9]             |         |         |
| <i>Felis catus</i>            | 21.94 | 8.85  | 3.05   | B  |     | C  | P              | [22]                | [2]               |         | [3,28]  |
| <i>Lynx lynx</i>              | 26.82 | 8     | 17.8   |    |     |    |                | [25]                | [2,9]             |         |         |
| <i>Mustela nivalis</i>        | 5.4   | 2.2   | 0.08   |    |     |    |                | [26]                | [2,9]             |         |         |
| <i>Mustela putorius furo</i>  | 7.5   | 3.57  | 0.83   | B  |     |    |                | [27]                | [2,9]             |         |         |
| <i>Odobenus rosmarus</i>      | 24.96 | 3.8   | 1060   | A  |     | D  | P              | [29]                | [2,9]             |         | [6,31]  |
| <i>Suricata suricatta</i>     | 10.5  | 6.3   | 0.62   | B  |     |    |                | [30]                | [6,9]             |         |         |
| <b><u>Chiroptera</u></b>      |       |       |        |    |     |    |                |                     |                   |         |         |
| <i>Artibeus cinereus</i>      | 4.4   | 1.4   | 0.07   | A  |     | N  |                | [32]                | [9,32]            |         | [35,36] |
| <i>Artibeus jamaicensis</i>   | 3.9   | 0.167 | 0.05   | B  |     |    |                | [33]                | [9,34]            |         |         |
| <i>Carollia perspicillata</i> | 2.62  | 0.94  | 0.02   | A  |     |    |                | [37]                | [9,38]            |         |         |
| <i>Desmodus rotundus</i>      | 2.5   | 0.625 | 0.03   | B  |     |    |                | [39]                | [9,34]            | [36,40] |         |
| <i>Eptesicus fuscus</i>       | 1.481 | 0.5   | 0.03   | B  |     | N  |                | [41]                | [9,42]            | [43]    |         |
| <i>Macroderma gigas</i>       | 7     | 1.9   | 0.15   | A  |     |    |                | [32]                | [9,32]            |         |         |
| <i>Megaderma lyra</i>         | 4.2   | 1.5   | 0.05   | A  |     |    |                | [32]                | [9,32]            |         |         |

|                                   |       |       |       |   |      |   |   |                     |          |              |
|-----------------------------------|-------|-------|-------|---|------|---|---|---------------------|----------|--------------|
| <i>Myotis dabentonii</i>          | 1.25  | 0.1   | 0.007 | B |      | N |   | [34]                | [9,34]   | [44]         |
| <i>Myotis mystacinus</i>          | 0.95  | 0.1   | 0.004 | B |      | N |   | [34]                | [9,34]   |              |
| <i>Nyctophilus gouldi</i>         | 1.9   | 0.6   | 0.01  | A |      |   |   | [32]                | [9,32]   |              |
| <i>Phyllostomus hastatus</i>      | 3.94  | 0.167 | 0.11  | B |      | N |   | [33]                | [9,38]   | [45]         |
| <i>Plecotus auritus</i>           | 1.8   | 1     | 0.007 | B |      | N |   | [34]                | [9,34]   | [3]          |
| <i>Pteropus giganteus</i>         | 9.65  | 1.7   | 0.90  | B |      | N | H | [46]                | [2,9]    | [3]          |
| <i>Pteropus poliocephalus</i>     | 13.3  | 5.5   | 0.68  | A |      |   |   | [32]                | [2,9]    |              |
| <i>Pteropus scapulatus</i>        | 11    | 4     | 0.36  | A |      |   |   | [32]                | [2,9]    |              |
| <i>Rhinolophus rouxi</i>          | 1.8   | 0.4   | 0.014 | A |      |   |   | [32]                | [9,34]   |              |
| <i>Rousettus madagascariensis</i> | 5.72  | 3     | 0.07  | A |      |   |   | [32]                | [2,47]   |              |
| <i>Taphozous georgianus</i>       | 3.7   | 1.3   | 0.03  | A |      |   |   | [32]                | [9,32]   |              |
| <b><u>Dasyuromorphia</u></b>      |       |       |       |   |      |   |   |                     |          |              |
| <i>Dasyurus hallucatus</i>        | 10    | 2.8   | 0.40  | B |      | N | P | [48]                | [9,48]   | [3,49]       |
| <i>Myrmecobius fasciatus</i>      | 11.70 | 5.2   | 0.46  | B | 33   | D |   | [50]                | [9,50]   | [51,52] [53] |
| <i>Sarcophilus harrisii</i>       | 14.5  | 4.75  | 6.37  | A |      |   |   | this study: [6,54]  | [6,9]    |              |
| <i>Sminthopsis crassicaudata</i>  | 5.088 | 2.36  | 0.015 | B | 10.9 | C | P | [55]                | [9,55]   | [3,55] [53]  |
| <b><u>Didelphimorphia</u></b>     |       |       |       |   |      |   |   |                     |          |              |
| <i>Didelphis marsupialis</i>      | 8.7   | 1.25  | 1.48  | A |      |   |   | [56]                | [6,9]    |              |
| <i>Didelphis virginiana</i>       | 10    | 2.49  | 2.19  | A |      |   |   | this study: [6,57]  | [2,9]    |              |
| <b><u>Diprotodontia</u></b>       |       |       |       |   |      |   |   |                     |          |              |
| <i>Macropus eugenii</i>           | 16.18 | 2.7   | 6.50  | B | 40   | C | H | [58]                | [9,58]** | [3] [53]     |
| <i>Macropus fuliginosus</i>       | 23.1  | 11.23 | 62.63 | A |      |   |   | this study: [6,59]  | [6,9]    |              |
| <i>Phascolarctos cinereus</i>     | 12.6  | 2.4   | 6.96  | A |      |   |   | [60]                | [9,61]   |              |
| <i>Setonyx brachyurus</i>         | 10.4  | 4.00  | 3.25  | A |      |   |   | this study: [55,62] | [9,62]   |              |
| <i>Tarsipes rostratus</i>         | 1.6   | 0.63  | 0.009 | B |      | C | H | [63]                | [9,64]   | [3,65]       |
| <i>Trichosurus vulpecula</i>      | 13.7  | 4.8   | 2.93  | A |      |   |   | [66]                | [6,9]    |              |
| <b><u>Lagomorpha</u></b>          |       |       |       |   |      |   |   |                     |          |              |
| <i>Oryctolagus cuniculus</i>      | 18.04 | 3     | 1.52  | B | 56   | C | H | [67]                | [6,9]    | [3,68] [69]  |
| <b><u>Monotremata</u></b>         |       |       |       |   |      |   |   |                     |          |              |
| <i>Tachyglossus aculeatus</i>     | 8     | 1.69  | 3.55  | A |      |   |   | [2,70]              | [2,9]    |              |

**Perissodactyla**

|                         |      |      |     |   |    |   |   |      |        |        |      |
|-------------------------|------|------|-----|---|----|---|---|------|--------|--------|------|
| <i>Diceros bicornis</i> | 27.6 | 6    | 985 | A |    |   |   | [71] | [6,9]  |        |      |
| <i>Equus caballus</i>   | 42   | 23.3 | 350 | B | 70 | C | H | [72] | [6,13] | [6,73] | [69] |

**Primates- Haplorhines\***

|                             |      |       |       |   |  |  |  |                                  |         |  |  |
|-----------------------------|------|-------|-------|---|--|--|--|----------------------------------|---------|--|--|
| <i>Alouatta caraya</i>      | 16.2 | 59.61 | 5.63  | A |  |  |  | this study: [6,74] <sup>2</sup>  | [6,9]   |  |  |
| <i>Aotus azarae</i>         | 19.9 | 8.3   | 1.06  | A |  |  |  | [75]                             | [6,9]   |  |  |
| <i>Aotus trivirgatus</i>    | 19.9 | 10    | 0.85  | B |  |  |  | [76]                             | [6,9]   |  |  |
| <i>Callithrix jacchus</i>   | 11.3 | 30    | 0.31  | A |  |  |  | [77]                             | [6,9]   |  |  |
| <i>Cebus apella</i>         | 14.1 | 54.75 | 2.77  | A |  |  |  | [78]                             | [6,9]   |  |  |
| <i>Chlorocebus aethiops</i> | 21.5 | 55.23 | 4.17  | A |  |  |  | this study: [79,80] <sup>2</sup> | [9,80]  |  |  |
| <i>Homo sapiens</i>         | 24   | 64    | 60.21 | B |  |  |  | [32]                             | [38,81] |  |  |
| <i>Macaca fascicularis</i>  | 18.4 | 46    | 4.30  | B |  |  |  | [82]                             | [6,9]   |  |  |
| <i>Macaca mulatta</i>       | 20   | 53.6  | 5.30  | B |  |  |  | [83,84]                          | [6,9]   |  |  |
| <i>Macaca nemestrina</i>    | 19.9 | 46    | 7.47  | B |  |  |  | [82]                             | [6,9]   |  |  |
| <i>Pan troglodytes</i>      | 20.9 | 64.28 | 49.21 | B |  |  |  | [85]                             | [6,9]   |  |  |
| <i>Saguinus midas</i>       | 12.2 | 24.87 | 0.43  | A |  |  |  | this study: [6,74] <sup>2</sup>  | [6,9]   |  |  |
| <i>Saimiri sciureus</i>     | 15   | 40.5  | 0.79  | B |  |  |  | [83]                             | [6,9]   |  |  |
| <i>Tarsius syrichta</i>     | 17   | 8.89  | 0.10  | A |  |  |  | [86]                             | [6,9]   |  |  |

**Primates- Strepsirrhines**

|                                |      |      |      |   |  |   |   |      |        |      |  |
|--------------------------------|------|------|------|---|--|---|---|------|--------|------|--|
| <i>Cheirogaleus medius</i>     | 10.3 | 2.84 | 0.18 | A |  |   |   | [86] | [6,9]  |      |  |
| <i>Eulemur macaco</i>          | 15.3 | 5.14 | 2.40 | B |  | C | H | [86] | [6,87] | [87] |  |
| <i>Galago senegalensis</i>     | 12.9 | 6.7  | 0.18 | B |  | N | P | [88] | [6,9]  | [89] |  |
| <i>Lemur catta</i>             | 15.6 | 6.7  | 1.96 | B |  | D | H | [90] | [6,9]  | [87] |  |
| <i>Microcebus murinus</i>      | 9.2  | 4.2  | 0.06 | A |  |   |   | [91] | [6,9]  |      |  |
| <i>Otolemur crassicaudatus</i> | 16.3 | 4.8  | 1.27 | B |  | N |   | [92] | [6,9]  | [93] |  |

**Proboscidea**

|                           |      |       |      |   |  |  |  |      |       |  |  |
|---------------------------|------|-------|------|---|--|--|--|------|-------|--|--|
| <i>Loxodonta africana</i> | 39.6 | 13.16 | 2420 | A |  |  |  | [94] | [6,9] |  |  |
|---------------------------|------|-------|------|---|--|--|--|------|-------|--|--|

**Rodentia**

|                            |       |      |      |   |  |  |  |      |         |  |  |
|----------------------------|-------|------|------|---|--|--|--|------|---------|--|--|
| <i>Agouti paca</i>         | 18.46 | 2.8  | 8.0  | A |  |  |  | [95] | [9,96]  |  |  |
| <i>Dasyprocta leporina</i> | 15.68 | 6.21 | 2.61 | A |  |  |  | [95] | [9,96]  |  |  |
| <i>Ellobius lutescens</i>  | 2.2   | 0.4  | 0.12 | A |  |  |  | [97] | [97,98] |  |  |

|                                  |       |      |       |   |      |   |   |                     |         |         |       |
|----------------------------------|-------|------|-------|---|------|---|---|---------------------|---------|---------|-------|
| <i>Ellobius talpinus</i>         | 2.9   | 0.9  | 0.04  | A |      |   |   | [97]                | [9,97]  |         |       |
| <i>Heterocephalus glaber</i>     | 1.6   | 0.44 | 0.06  | A |      |   |   | [99]                | [9,100] |         |       |
| <i>Hydrochoerus hydrochaeris</i> | 21.04 | 5.8  | 39.13 | A |      |   |   | [95]                | [9,95]  |         |       |
| <i>Lemmus lemmus</i>             | 2.40  | 0.83 | 0.05  | B |      | C | H | [101]               | [2,9]   | [3]     |       |
| <i>Meriones unguiculatus</i>     | 6.11  | 1.8  | 0.06  | B | 14.5 | C | H | [102,103]           | [9,104] | [3,105] | [106] |
| <i>Mesocricetus auratus</i>      | 6.32  | 0.5  | 0.10  | B |      |   |   | [107]               | [9,108] |         |       |
| <i>Mus musculus</i>              | 5.28  | 0.5  | 0.02  | B | 13.1 | N |   | [109]               | [2,9]   | [3]     | [110] |
| <i>Peromyscus maniculatus</i>    | 4.9   | 0.56 | 0.03  | B | 15.9 | N |   | [111]               | [6,13]  | [6,112] | [113] |
| <i>Rattus norvegicus</i>         | 5.58  | 1.6  | 0.29  | B | 9.7  | N |   | [114]               | [2,9]   | [3,6]   | [69]  |
| <i>Sciurus carolinensis</i>      | 11.8  | 3.9  | 0.49  | B | 27   | D |   | [115]               | [6,9]   | [6,116] | [69]  |
| <i>Sciurus niger</i>             | 12    | 3.9  | 0.76  | B | 24   | D |   | [115]               | [6,9]   | [6,117] | [13]  |
| <i>Spermophilus beecheyi</i>     | 9.54  | 4    | 0.60  | B |      | D |   | [112]               | [9,12]  | [3]     |       |
| <b><u>Scandentia</u></b>         |       |      |       |   |      |   |   |                     |         |         |       |
| <i>Tupaia belangeri</i>          | 7.60  | 2.4  | 0.16  | B |      | D |   | [119]               | [6,9]   | [120]   |       |
| <i>Tupaia glis</i>               | 8.7   | 4.7  | 0.13  | B |      | D |   | [121]               | [6,9]   | [3,120] |       |
| <b><u>Xenarthra</u></b>          |       |      |       |   |      |   |   |                     |         |         |       |
| <i>Choloepus didactylus</i>      | 10.2  | 1.54 | 4.66  | A |      |   |   | this study: [6,122] | [6,9]   |         |       |

Abbreviations: eye length/axial diameter (AD, mm); visual acuity (VA, cpd); body mass (BM, kg); measurement type (MT)- anatomical (A), behavioral (B); maximum running speed (MRS, kph); activity pattern (AP)- diurnal (D), cathemeral/arrhythmic (C), nocturnal (N); Diet - herbivorous (H), active predator (P).

<sup>1</sup>Species were categorized as “active predators” if they were reported in the literature as actively catching moving prey.

<sup>2</sup> for haplorhine primates, which exhibit no retinal summation, acuity was calculated from peak retinal cone cell density rather than ganglion cell density.

\* All haplorhines were excluded from ecological comparisons.

\*\* eye length estimated from anatomically measured retinal magnification factor using Pettigrew et al.’s [32] formula.

#### Data Sources:

- 1 Hebel R (1976): Distribution of retinal ganglion cells in five mammalian species (pig, sheep, ox, horse, dog). *Anat Embryol* 150:45–51.
- 2 Howland HC, Merola S, Basarab JR (2004): The allometry and scaling of the size of vertebrate eyes. *Vision Res* 44:2043–2065.
- 3 Nowak RM (1999): *Walker's Mammals of the World*. 6th edn. Baltimore, Johns Hopkins University Press.
- 4 Betteridge K, Costall D, Ballardur S, Upsdell M, Umemura K (2010): Urine distribution and grazing behaviour of female sheep and cattle grazing a steep New Zealand hill pasture. *Anim Prod Sci* 50:624–629.
- 5 Harman A, Dann J, Ahmat A, Macuda T, Johnston K, Timney B (2001): The retinal ganglion cell layer and visual acuity of the camel. *Brain Behav Evol* 58:15–27.
- 6 Ross CF, Kirk EC (2007): Evolution of eye size and shape in primates. *J Hum Evol* 52:294–313.
- 7 Pérez-Barbería FJ, Shultz S, Dunbar RIM (2007): Evidence for coevolution of sociality and relative brain size in three orders of mammals. *Evolution* 61:2811–2821.
- 8 Christiansen P (2002): Locomotion in terrestrial mammals: the influence of body mass, limb length and bone proportions on speed. *Zool J Linn Soc* 136:685–714.
- 9 Silva M, Downing JA (1995): *CRC Handbook of Mammalian Body Masses*. New York, CRC Press.
- 10 Ribeiro AP, Santos NL, Silva VC, Campos AF, Teixeira IAM, Laus JL (2010): Ultrasonographic and ecobiometric findings in the eyes of adult goats. *Ciência Rural* 40:568–573.
- 11 Gonzalez-Soriano J, Mayayo-Vicente S, Martinez-Sainz P, Contreras-Rodriguez J, Rodriguez-Veiga E (1997): A quantitative study of ganglion cells in the goat retina. *Anat Histol Embryol* 26:39–44.
- 12 Hughes A (1977): The topography of vision in mammals of contrasting lifestyle: comparative optics and retinal organisation; in F Crescitelli (ed): *Handbook of Sensory Physiology*. Berlin, Springer-Verlag, pp. 613–756.
- 13 Heard-Booth AN, Kirk EC (2012): The influence of maximum running speed on eye size: a test of Leuckart's Law in mammals. *Anat Rec* 295:1053–1062.
- 14 Coimbra JP, Hart NS, Collin SP, Manger PR (2013): Scene from above: retinal ganglion cell topography and spatial resolving power in the giraffe (*Giraffa camelopardalis*). *J Comp Neurol* 521:2042–2057.
- 15 Tanaka T, Hashimoto A, Tanida H, Yoshimoto T (1995): Studies on the visual acuity of sheep using shape discrimination learning. *J Ethol* 13:69–75.

- 16 Garcá M, Ruiz-Ederra J, Hernández-Barbáchano H, Vecino E (2005): Topography of pig retinal ganglion cells. *J Comp Neurol* 486:361–372.
- 17 Guthoff R, Berger R, Draeger, J (1987): Ultrasonographic measurement of the posterior coats of the eye and their relation to axial length. *Graefes Arch Clin Exp Ophthalmol* 225:374–376.
- 18 Peichl L (1992): Morphological types of ganglion cells in the dog and wolf retina. *J Comp Neurol* 324:590–602.
- 19 Peichl L (1992): Topography of ganglion cells in the dog and wolf retina. *J Comp Neurol* 324:603–620.
- 20 Calderone JB, Reese BE, Jacobs GH (2003): Topography of photoreceptors and retinal ganglion cells in the spotted hyena (*Crocuta crocuta*). *Brain Behav Evol* 62:182–192.
- 21 Mass AM, Supin AY (2000): Ganglion cells density and retinal resolution in the sea otter, *Enhydra lutris*. *Brain Behav Evol* 55:111–119.
- 22 Jacobson SG, Franklin KBJ, McDonald WI (1976): Visual acuity of the cat. *Vision Res* 16:1141–1143.
- 23 Pellis SM, Officer RCE (1987) An analysis of some predatory behaviour patterns in four species of carnivorous marsupials (Dasyuridae), with comparative notes on the eutherian cat *Felis catus*. *Ethology* 75:177–196.
- 24 Gittleman JL (1985): Carnivore body size: Ecological and taxonomic correlates. *Oecologia* 67:540–554.
- 25 Maffei L, Fiorentini A, Bisti S (1990): The visual acuity of the lynx. *Vision Res* 30:527–528.
- 26 Heffner RS, Heffner HE. (1992): Visual factors in sound localization in mammals. *J Comp Neurol* 317:219–232.
- 27 Pontenagel VT, Schmidt U (1980): Untersuchungen zur Leistungsfähigkeit des Gesichtssinnes beim Frettchen, *Mustela putorius f. furo* L. *Z. Säugetierkunde* 45:376–383.
- 28 Marcelli M, Fusillo R, Boitani L (2003): Sexual segregation in the activity patterns of European polecats (*Mustela putorius*). *J Zool* 261:249–255.
- 29 Mass AM (1992) Retinal topography in the walrus (*Odobenus rosmarus divergens*) and fur seal (*Callorhinus ursinus*); in Thomas JA, Kastelein RA, Supin YA (eds): *Marine Mammal Sensory Systems*. New York, Plenum, pp. 119–135.
- 30 Moran G, Timney B, Sorensen L, Desrochers B (1983): Binocular depth perception in the meerkat (*Suricata suricatta*). *Vision Res* 23:965–969.
- 31 van Staaden MJ (1994): *Suricata suricatta*. *Mammalian Species* 483:1–8.

- 32 Pettigrew JD, Dreher B, Hopkins CS, McCall MJ, Brown M (1988): Peak density and distribution of ganglion cells in the retinae of microchiropteran bats: implications for visual acuity. *Brain Behav Evol* 32:39–56.
- 33 Suthers RA (1966): Optomotor responses by echolocating bats. *Science* 152:1102–1104.
- 34 Eklöf J (2003): Vision in echolocating bats [PhD thesis]. Göteborg, Sweden, Göteborg University.
- 35 Ortega J, Castro-Arellano I (2001): *Artibeus jamaicensis*. *Mammalian Species* 662:1–9.
- 36 Hall MI, Kamilar J, Kirk EC (2012): Eye shape and the nocturnal bottleneck of mammals. *Proc R Soc Lond B* 279:4962–4968.
- 37 Heffner RS, Koay G, Heffner HE (2007): Sound-localization acuity and its relation to vision in large and small fruit-eating bats: I. Echolocating species, *Phyllostomus hastatus* and *Carollia perspicillata*. *Hear Res* 234:1–9.
- 38 Suthers RA, Wallis NE (1970): Optics of the eyes of echolocating bats. *Vision Res* 10:1165–1173.
- 39 Manske U, Schmidt, U (1976): Visual acuity of the vampire bat, *Desmodus rotundus*, and its dependence upon light intensity. *Zeit Tierpsychol* 42:215–221.
- 40 Greenhall AM, Joermann G, Schmidt U, Seidel MR (1983): *Desmodus rotundus*. *Mammalian Species* 202:1–6.
- 41 Bell GP, Fenton MB (1986): Visual acuity, sensitivity and binocularity in a gleaning insectivorous bat, *Macrotus californicus* (Chiroptera: Phyllostomidae). *Anim Behav* 34:409–414.
- 42 Koay G, Kearns D, Heffner HE, Heffner RS (1998): Passive sound-localization ability of the big brown bat (*Eptesicus fuscus*). *Hear Res* 119:37–48.
- 43 Kurta A, Baker RH (1990): *Eptesicus fuscus*. *Mammalian Species* 356: 1–10.
- 44 Bogdanowicz W (1994): *Myotis daubentonii*. *Mammalian Species* 475:1–9.
- 45 Santos M, Aguirre LF, Vázquez LB, Ortega J (2003): *Phyllostomus hastatus*. *Mammalian Species* 722: 1–6.
- 46 Müller B, Goodman SM, Peichl L (2007): Cone photoreceptor diversity in the retinas of fruit bats (Megachiroptera). *Brain Behav Evol* 70:90–104.
- 47 MacKinnon JL, Hawkins CE, Racey PA (2003): Pteropididae; in Goodman SM, Benstead J (eds): *In The Natural History of Madagascar*. Chicago, University of Chicago Press, pp 1299–1302
- 48 Harman AM, Nelson JE, Crewther SG, Crewther DP (1986): Visual acuity of the northern native cat (*Dasyurus hallucatus*) - Behavioural and anatomical estimates. *Behav Brain Res* 22:211–216.

49. Oakwood M (2002): Spatial and social organization of a carnivorous marsupial *Dasyurus hallucatus* (Marsupialia: Dasyuridae). *J Zool* 257:237–248.
50. Arrese C, Archer M, Runham P, Dunlop SA, Beazley LD (2000): Visual system in a diurnal marsupial, the numbat (*Myrmecobius fasciatus*): retinal organization, visual acuity and visual fields. *Brain Behav Evol* 55:163–175.
51. Cooper CE (2011): *Myrmecobius fasciatus* (Dasyuromorphia: Myrmecobiidae). *Mammalian Species* 43:129–140.
52. Cooper CE, Withers PC (2004): Influence of season and weather on activity patterns of the numbat (*Myrmecobius fasciatus*) in captivity. *Aust J Zool* 52:475–485.
53. Garland T, Geiser F, Baudinette RV: (1988) Comparative locomotor performance of marsupial and placental mammals. *J Zool* 215:505–522.
54. Tancred E (1981): The distribution and sizes of ganglion cells in the retinas of five Australian marsupials. *J Comp Neurol* 196:585–603.
55. Arrese C, Dunlop SA, Harman AM, Braekevelt CR, Ross WM, Shand J, Beazley LD (1999): Retinal structure and visual acuity in a polyprotodont marsupial, the fat-tailed dunnart (*Sminthopsis crassicaudata*). *Brain Behav Evol* 53:111–126.
56. Silveira LC, Picanço-Diniz CW, Oswaldo-Cruz E (1982): Contrast sensitivity function and visual acuity of the opossum. *Vision Res* 22:1371–1377.
57. Kolb H, Wang HH (1985): The distribution of photoreceptors, dopaminergic amacrine cells and ganglion cells in the retina of the north american opossum (*Didelphis virginiana*). *Vision Res* 25:1207–1221.
58. Hemmi JM, Mark RF (1998): Visual acuity, contrast sensitivity and retinal magnification in a marsupial, the tammar wallaby (*Macropus eugenii*). *J Comp Physiol A* 183:379–387.
59. Dunlop SA, Longley WA, Beazley LD (1987): Development of the area centralis and visual streak in the grey kangaroo *Macropus fuliginosus*. *Vision Res* 27:151–164.
60. Schmid KL, Schmid LM, Wildsoet CF, Pettigrew JD (1992): Retinal topography in the koala (*Phascolarctos cinereus*). *Brain Behav Evol* 39:8–16.
61. Hirst LW, Brown AS, Kempster R, Winney N (1992): Ophthalmologic examination of the normal eye of the koala. *J Wildl Dis* 28:419–423.
62. Fleming PA, Harman AM, Beazley LD (1997): Changing topography of the RPE resulting from experimentally induced rapid eye growth. *Vis Neurosci* 14:449–461.
63. Arrese C, Archer M, Beazley LD (2002): Visual capabilities in a crepuscular marsupial, the honey possum (*Tarsipes rostratus*): a visual approach to ecology. *J Zool* 256:151–158.
64. Dunlop SA, Ross WM, Beazley LD (1994): The retinal ganglion cell layer and optic nerve in a marsupial, the honey possum (*Tarsipes rostratus*). *Brain Behav Evol* 44:307–323.



- 65 Bradshaw SD, Bradshaw FJ (2002): Short-term movements and habitat use of the marsupial honey possum (*Tarsipes rostratus*). J Zool 258:343–348.
- 66 Freeman B, Tancred E (1978): The number and distribution of ganglion cells in the retina of the brush-tailed possum, *Trichosurus vulpecula*. J Comp Neurol 177:557–567.
- 67 Van Hof MW (1967): Visual acuity in the rabbit. Vision Res 7:749–751.
- 68 Lombardi L, Fernández N, Moreno S, Villafuerte R (2003): Habitat-related differences in rabbit (*Oryctolagus cuniculus*) abundance, distribution, and activity. J Mammal 84:26–36.
- 69 Garland T (1983): The relation between maximal running speed and body mass in terrestrial mammals. J Zool 199:157–170.
- 70 Stone J (1983): Topographical organisation of the retina in a monotreme: Australian spiny anteater *Tachyglossus aculeatus*. Brain Behav Evol 22:175–184.
- 71 Pettigrew JD, Manger PR (2008): Retinal ganglion cell density of the black rhinoceros (*Diceros bicornis*): calculating visual resolution. Vis Neurosci 25:215–220.
- 72 Timney B, Keil K (1992): Visual acuity in the horse. Vision Res 32:2289–2293.
- 73 Bennett D, Hoffmann RS (1999): *Equus caballus*. Mammalian Species 628:1–14.
- 74 Franco ECS, Finlay BL, Silveira LCL, Yamada ES, Crowley JC (2000): Conservation of absolute foveal area in New World monkeys. Brain Behav Evol 56:276–286.
- 75 Yamada ES, Silveira LCL, Perry VH, Franco ECS (2001): M and P retinal ganglion cells of the owl monkey: morphology, size and photoreceptor convergence. Vision Res 41:119–131.
- 76 Jacobs GH (1977): Visual capacities of the owl monkey (*Aotus trivirgatus*)--II. Spatial contrast sensitivity. Vision Res 17:821–825.
- 77 Troilo D, Howland HC, Judge SJ (1993): Visual optics and retinal cone topography in the common marmoset (*Callithrix jacchus*). Vision Res 33:1301–1310.
- 78 Andrade da Costa BL, Hokoç JN (2000): Photoreceptor topography of the retina in the New World monkey *Cebus apella*. Vision Res 40:2395–2409.
- 79 Perry VH, Cowey A (1985): The ganglion cell and cone distributions in the monkey's retina: Implications for central magnification factors. Vision Res 25:1795–1810.
- 80 Herbin M, Boire D, Ptito M (1997): Size and distribution of retinal ganglion cells in the St. Kitts green monkey (*Cercopithecus aethiops sabeus*). J Comp Neurol 383:459–472.
- 81 Smith RJ, Jungers WL (1997): Body mass in comparative primatology. J Hum Evol 32:523–559.
- 82 De Valois RL, Morgan H, Snodderly DM (1974): Psychophysical studies of monkey vision. 3. Spatial luminance contrast sensitivity tests of macaque and human observers. Vision Res 14:75–81.

- 83 Cowey A, Ellis CM (1967): Visual acuity of rhesus and squirrel monkeys. *J Comp Physiol Psychol* 64:80–84.
- 84 Cavanaugh CR, Robbins DO (1973): Relationship between luminance and visual acuity in the rhesus monkey. *J. Physiol (Lond.)* 232:239–246.
- 85 Spence KW (1934): Visual acuity and its relation to brightness in chimpanzee and man. *J Comp Psychol* 18:333–361.
- 86 Veilleux CC, Kirk EC (2009): Visual acuity in the cathemeral strepsirrhine *Eulemur macaco flavifrons*. *Am J Primatol* 71:343–352.
- 87 Gould L, Sauther M, Cameron A (2011): Lemuriformes; in Campbell CJ, Fuentes A, MacKinnon KC, Panger M, Bearder SK (eds): *Primates in Perspective*. Oxford, Oxford University Press, pp 55–79.
- 88 Treff HA (1967) Tiefensehscharfe und sehscharfe beim galago (*Galago senegalensis*). *Z. vergl Physiol* 54:26–57.
- 89 Larson CF, Dodson DL, Ward JP (1989): Hand preferences and Whole (*Galago senegalensis*). *Brain Behav Evol* 33:261–267.
- 90 Neuringer M, Kosobud A, Cochrane G. (1981): Visual acuity of *Lemur catta*, a diurnal prosimian. *Invest Ophthalmol Vis Sci* 20:49.
- 91 Dkhissi-Benyahya O, Szel A, Degrip WJ, Cooper HM (2001): Short and mid-wavelength cone distribution in a nocturnal Strepsirrhine primate (*Microcebus murinus*). *J Comp Neurol* 438:490–504.
- 92 Langston A, Casagrande VA, Fox R (1986): Spatial resolution of the Galago. *Vision Res* 26:791–796.
- 93 Nekaris KAI, Bearder SK (2011): Lorisiform primates of Asia and Africa; in Campbell CJ, Fuentes A, MacKinnon KC, Panger M, Bearder SK (eds): *Primates in Perspective*. Oxford, Oxford University Press, pp 34–54.
- 94 Pettigrew JD, Bhagwandin A, Haagenzen M, Manger PR (2010): Visual acuity and heterogeneities of retinal ganglion cell densities and the tapetum lucidum of the African elephant (*Loxodonta africana*). *Brain Behav Evol* 75:251–261.
- 95 104 Silveira LCL, Picanço-Diniz CW, Oswaldo-Cruz E (1989): Distribution and size of ganglion cells in the retinae of large Amazon rodents. *Visual Neurosci* 2:221–235.
- 96 Oswaldo-Cruz E, Picanço-Diniz CW, Silveira LCL (1985): Physiological optics of some Amazon rodents with contrasting life style. *J Physiol (Lond)* 267:18P.
- 97 Herbin M, Repérant J, Cooper HM (1994): Visual system of the fossorial mole-lemmings, *Ellobius talpinus* and *Ellobius lutescens*. *J Comp Neurol* 346:253–275.
- 98 Coşkun Y, Ulutürk S (2003): Observations on the mole vole, *Ellobius lutescens* Thomas 1897, (Mammalia: Rodentia) in Turkey. *Turk J Zool* 27:81–87.

- 99 Heffner RS, Heffner HE (1993): Degenerate hearing and sound localization in naked mole rats (*Heterocephalus glaber*), with an overview of central auditory structures. J Comp Neurol 331:418–433.
- 100 Hetling JR, Baig-Silva MS, Comer CM, Pardue MT, Samaan DY, Qtaishat NM, Pepperberg DR, Park TJ (2005): Features of visual function in the naked mole-rat *Heterocephalus glaber*. J Comp Physiol A 191:317–330.
- 101 Rahmann VH, Esser M (1965): Bestimmung der Sehschärfe (Minimum separabile) sowie Dressurverhalten des skandinavischen Berglemmings (*Lemmus lemmus* L.). Z Saugetierkunde 30:47–53.
- 102 Wilkinson F (1984): The development of visual acuity in the mongolian gerbil (*Meriones unguiculatus*). Behav Brain Res 13:83–94.
- 103 Baker AG, Emerson VF (1983): Grating acuity of the Mongolian gerbil (*Meriones unguiculatus*). Behav Brain Res 8:195–209.
- 104 Wilkinson F (1986): Eye and brain growth in the mongolian gerbil (*Meriones unguiculatus*). Behav Brain Res 19:59–69.
- 105 Gulotta EF (1971): *Meriones unguiculatus*. Mammalian Species 3:1–5.
- 106 Chappell MA, Garland T, Robertson GF, Saltzman W (2007): Relationships among running performance, aerobic physiology and organ mass in male Mongolian gerbils. J Exp Biol 210:4179–4197.
- 107 Emerson VF (1980): Grating acuity of the golden hamster. The effects of stimulus orientation and luminance. Exp Brain Res 38:43–52.
- 108 Lin H-J, Wan L, Chen W-C, Lin J-M, Lin C-J, Tsai F-J (2012): Muscarinic acetylcholine receptor 3 is dominant in myopia progression. Invest Ophthalmol Vis Sci 53:6519–6525.
- 109 Prusky GT, West PW, Douglas RM (2000): Behavioral assessment of visual acuity in mice and rats. Vision Res 40:2201–2209..
- 110 Layne JN, Benton AH (1954): Some speeds of small mammals. J Mammal 35:103–104.
- 111 Rahmann H, Rahmann M, King JA (1968): Comparative visual acuity (minimum separable) in five species and subspecies of deermice (*Peromyscus*). Physiol Zool 41:298–312.
- 112 Drickamer LC (1970): Seed preferences in wild caught *Peromyscus maniculatus bairdii* and *Peromyscus leucopus noveboracensis*. J Mammal 51:191–194.
- 113 Djawdan M, Garland T (1988): Maximal running speeds of bipedal and quadrupedal rodents. J Mammal 69:765–772.
- 114 Seymoure P, Juraska JM (1997): Vernier and grating acuity in adult hooded rats: the influence of sex. Behav Neurosci 111:792–800.

- 115 Jacobs GH, Birch DG, Blakeslee B (1982): Visual acuity and spatial contrast sensitivity in tree squirrels. *Behav Proc* 7:367–375.
- 116 Koprowski JL (1994): *Sciurus carolinensis*. *Mammalian Species* 480:1–9.
- 117 Koprowski JL (1994): *Sciurus niger*. *Mammalian Species* 479:1–9.
- 118 Jacobs GH, Blakeslee B, McCourt ME, Tootell RBH (1980): Visual sensitivity of ground squirrels to spatial and temporal luminance variations. *J Comp Physiol A* 136:291–299.
- 119 Petry HM, Fox R, Casagrande VA (1984): Spatial contrast sensitivity of the tree shrew. *Vision Res* 24:1037–1042.
- 120 Kawamichi T, Kawamichi M (1981): Social organization of tree shrews; in Chiarelli AB, Corruccini RS (eds): *Primate Behavior and Sociobiology*. Berlin, Springer-Verlag, pp 1–17.
- 121 Schäfer D (1969): Untersuchungen zur Sehphysiologie des Spitzhörnchens *Tupaia glis* (Diard 1820). *Z vergl Physiologie* 63:204–226.
- 122 Andrade-da-Costa BL, Pessoa VF, Bousfield JD, Clarke RJ (1989): Ganglion cell size and distribution in the retina of the two-toed sloth (*Choloepus didactylus*). *Braz J Med Biol Res* 22:233–236.
